# Supplementary material for: Enhanced mitochondrial biogenesis promotes neuroprotection in human pluripotent stem cell derived retinal ganglion cells
Source: PubMed Central journal article supplement (PMC9957998; doi:10.1038/s42003-023-04576-w), 2023-02-24
Supplement: 42003_2023_4576_MOESM2_ESM.pdf [file 42003_2023_4576_MOESM2_ESM.pdf]

## Supplementary Figure 1

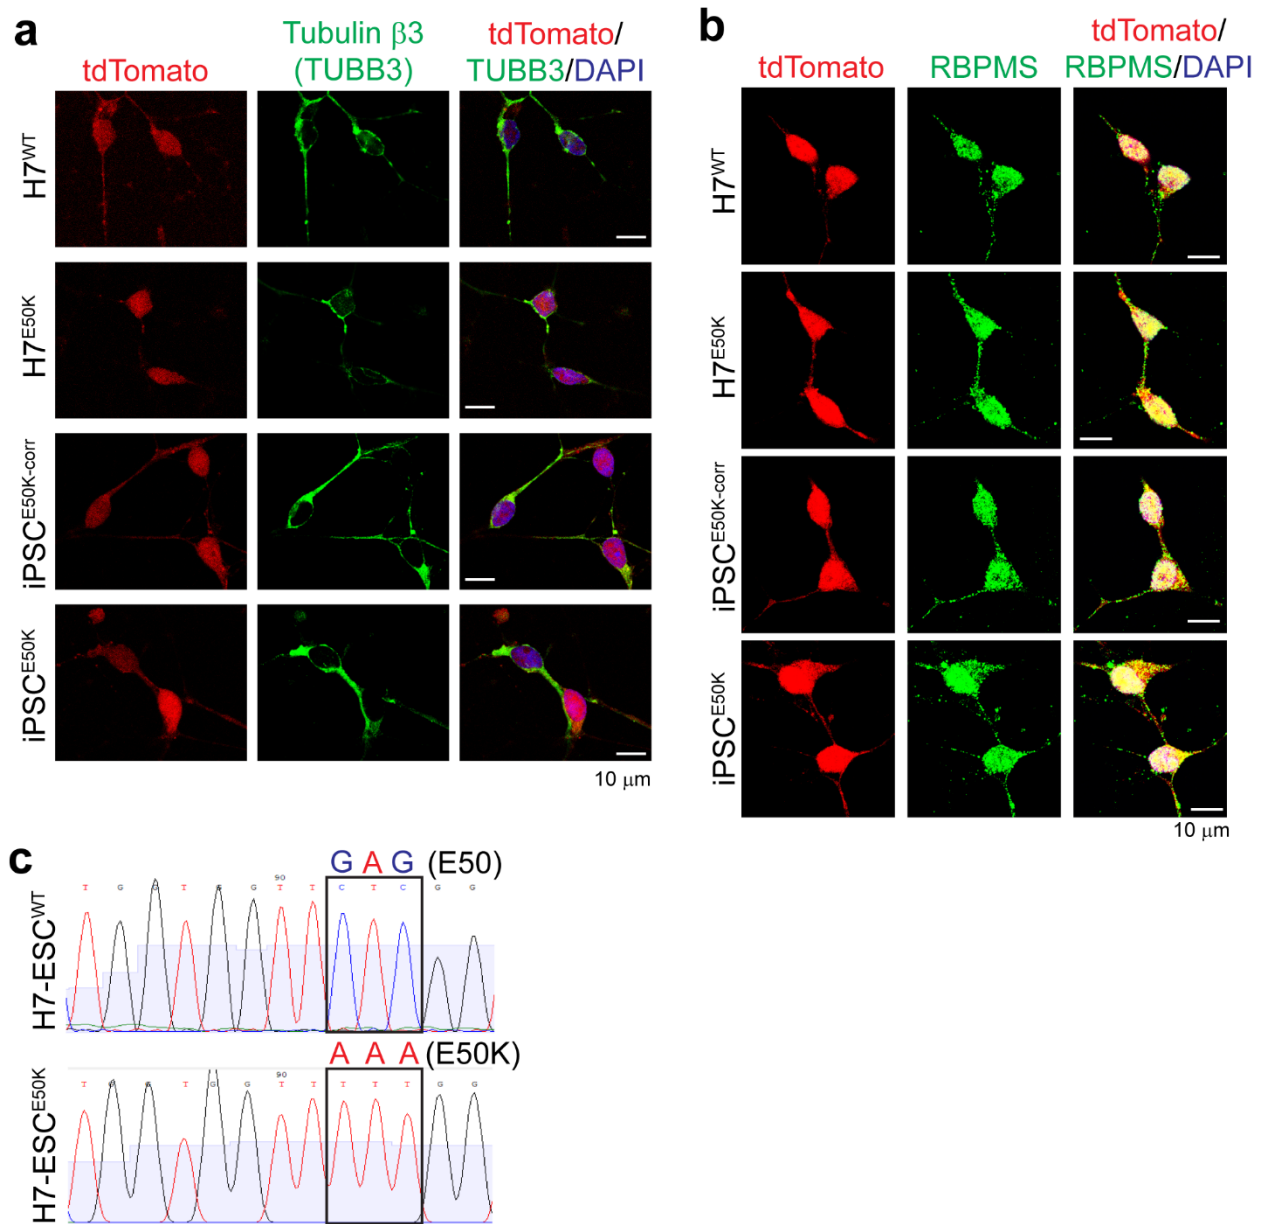

**Supplementary Figure 1. hRGC differentiation and CRISPR mutated *OPTN*<sup>E50K</sup> stem cell lines.** (a-b) Shown are confocal immunofluorescence images of hRGCs against (a) neuronal marker TUBB3 and (b) RGC specific marker RBPMS. Scale bars are 10  $\mu$ m. (c) Sanger sequencing chromatograms show the E50 sequence and the homozygous E50K mutation in the H7-ESCs.

## Supplementary Figure 2

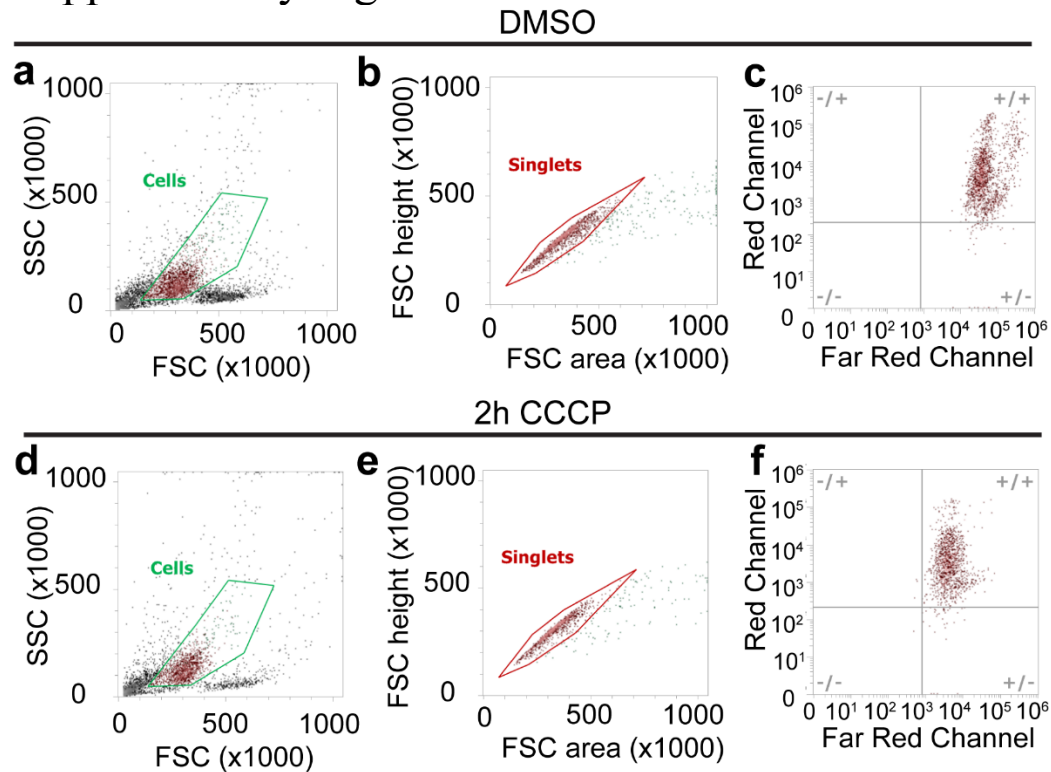

**Supplementary Figure 2. Flow cytometry measurements of MTDR labelled mitochondrial mass in hRGCs.** Live hRGCs were gated from the total population measured after (a) DMSO and (d) 2h 10  $\mu$ M CCCP treatments. From the live cells, (b, e) singlet population was then gated, and (c, f) subsequently analyzed for average MTDR intensity positive for both tdTomato (red) and MTDR (far red). (f) CCCP treatment reduces MTDR positive mitochondrial mass as shown by the left shift of MTDR positive cells.

### Supplementary Figure 3

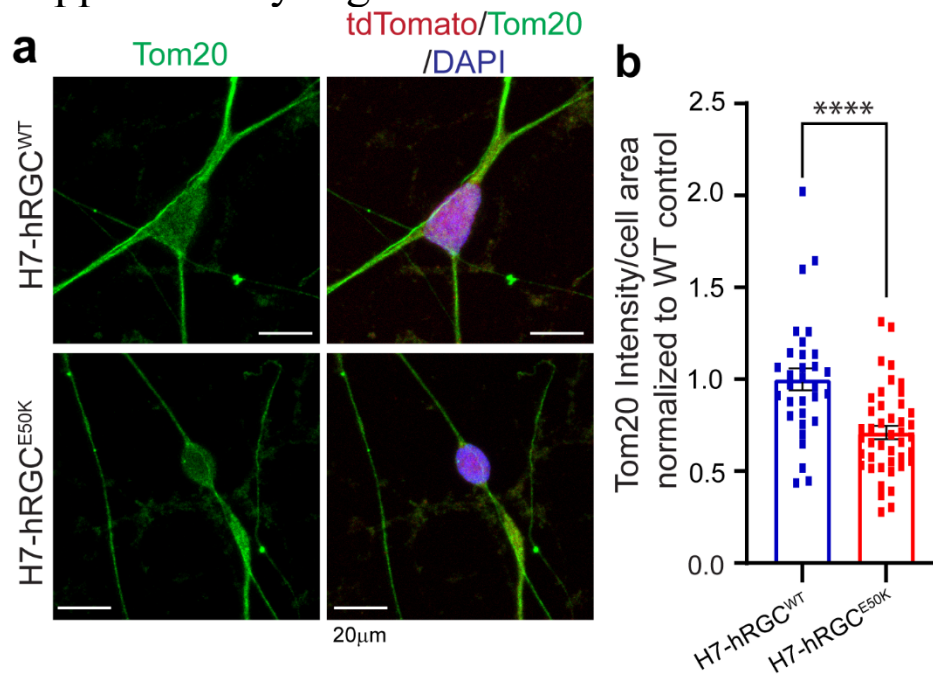

**Supplementary Figure 3. Glaucomatous *OPTN*<sup>E50K</sup> hRGCs possess less mitochondrial mass.** (a) Representative confocal immunofluorescence images of Tom20, tdTomato, and DAPI of untreated WT and E50K H7-hRGCs. Scale bars are 20  $\mu$ m. (b) Quantification of Tom20 intensity from the sum projections of z-stacks relative to cell area, normalized to WT. Unpaired student's *t*-test. \*\*\*\*, *p*-value < 0.0001, *n*=30 cells (3 biological replicates). Error bars are SEM.

## Supplementary Figure 4

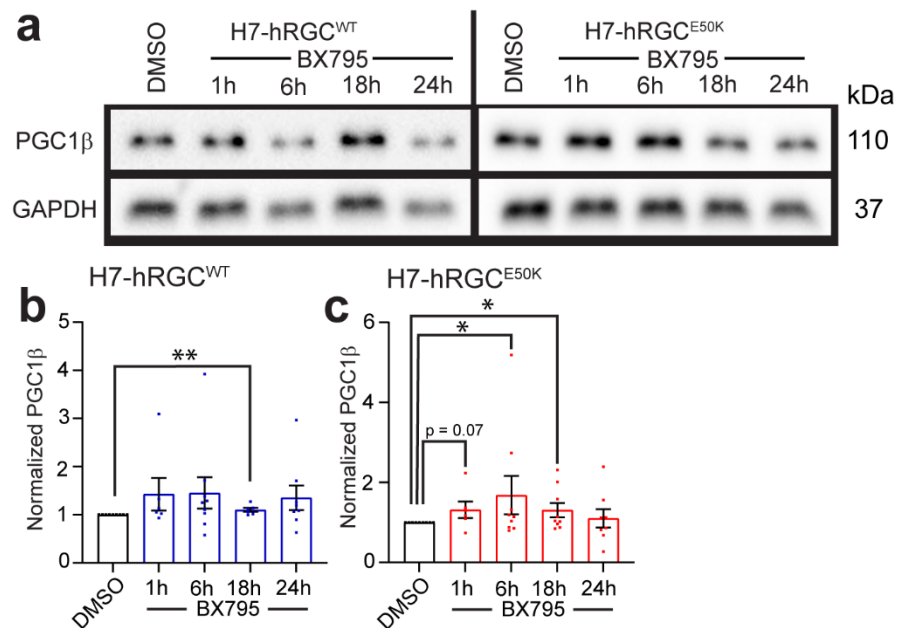

### Supplementary Figure 4. TBK1 inhibition by BX795 increases PGC1 $\beta$ level in hRGCs.

**(a)** Representative western blot images of H7-hRGCs treated with 1  $\mu$ g/ml BX795 for the indicated timepoints. **(b, c)** Quantification of average western blot band intensities of PGC1 $\beta$  relative to its GAPDH loading control, then normalized to DMSO control, for **(b)** WT and **(c)** E50K hRGCs.  $n=6-9$ . Unpaired student's *t*-test between DMSO and the individual timepoints. \*  $p$ -value < 0.05, \*\*  $p$ -value < 0.01. Error bars are SEM.

## Supplementary Figure 5

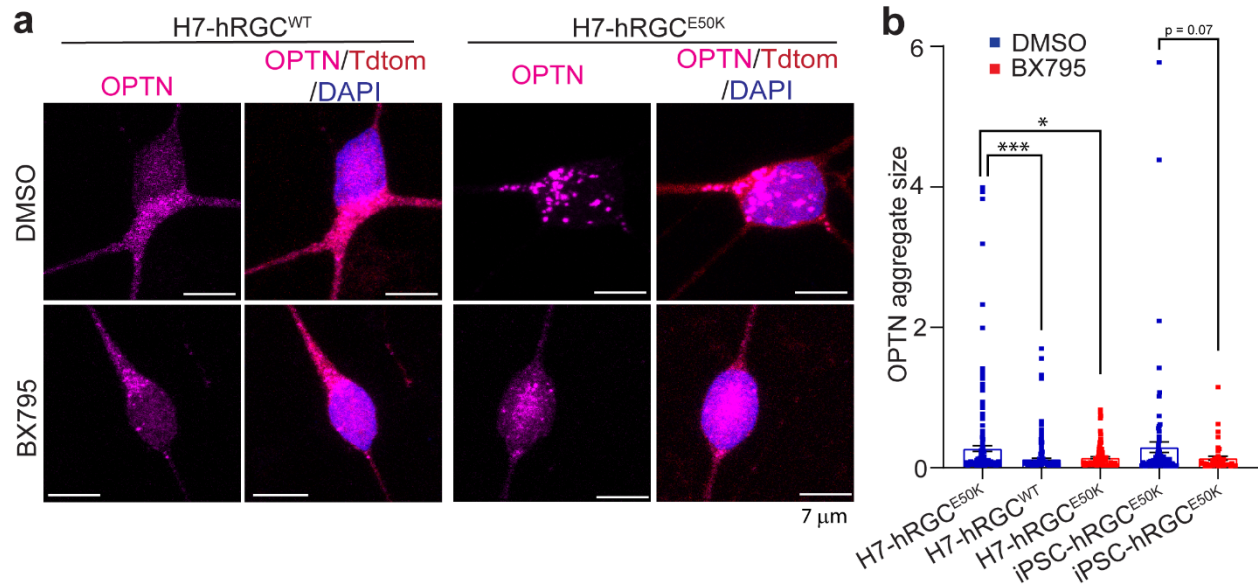

### Supplementary Figure 5. BX795 treatment dissolves OPTN<sup>E50K</sup> aggregates in hRGCs.

**(a)** Representative confocal immunofluorescence images of OPTN, tdTomato, and DAPI of H7-hRGCs treated with 1  $\mu$ g/ml BX795 for 24hrs. **(b)** Quantification of OPTN aggregate size from the sum projections of confocal z-stacks. Mann Whitney U test between independent data sets. \* p-value <0.05, \*\*\* p-value <0.001, n=130-250 aggregates. Error bars are SEM.

## Supplementary Figure 6

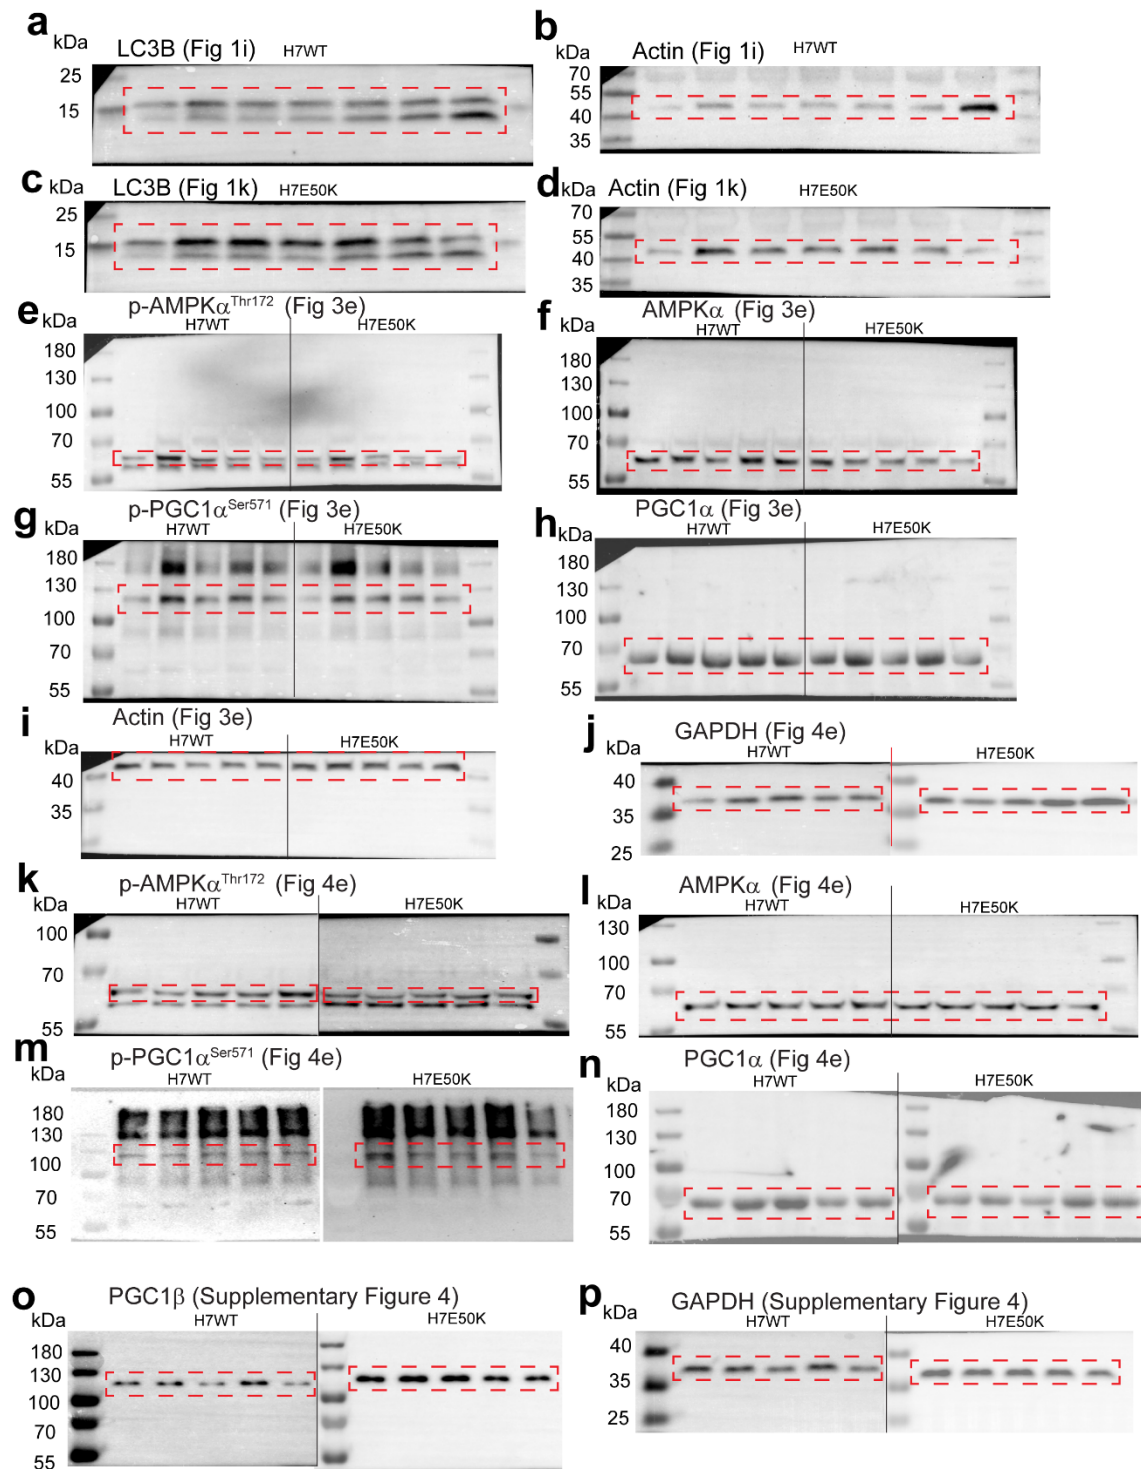

### Supplementary Figure 6. Full size images of representative western blots.

Full blot images of western blot membranes from hRGCs shown in previous figures with molecular weight marker. Red boxes represent quantified protein bands.

**Supplementary Table 1: list of reagents, software, antibodies, and primers (qPCR)**

| <b>REAGENTS AND ASSAY KITS</b>                          |                              |                            |
|---------------------------------------------------------|------------------------------|----------------------------|
| <b>Reagent</b>                                          | <b>Manufacturer</b>          | <b>Catalog Number</b>      |
| Matrigel                                                | Corning                      | CB40230                    |
| Gentle Cell Dissociation Reagent                        | Stem Cell Technology         | 7174                       |
| mTeSR1                                                  | Stem Cell Technology         | 85850                      |
| Accutase                                                | Sigma                        | A6964                      |
| Blebbistatin                                            | Sigma                        | B0560                      |
| DMEM/F-12                                               | Thermo Scientific            | 11330032                   |
| Neurobasal media                                        | Thermo Scientific            | 21103049                   |
| GlutaMAX supplement (100X)                              | Invitrogen                   | 35050061                   |
| Antibiotic-Antimycotic                                  | Thermo Scientific            | 15240062                   |
| B27 supplement                                          | Thermo Scientific            | 17504044                   |
| N2 supplement                                           | Thermo Scientific            | 17502048                   |
| Nicotinamide                                            | Sigma                        | N3376                      |
| IDE2                                                    | Tocris                       | 4016                       |
| Forskolin                                               | Stem cell technologies       | 3828S                      |
| Dorsomorphin                                            | Stem cell technologies       | P5499                      |
| DAPT                                                    | Sigma                        | D5942                      |
| MACS kit                                                | Miltenyi Biotec              | 130-091-051<br>130-042-108 |
| CD90.2 MicroBeads, mouse                                | Miltenyi Biotec              | 130-121-278                |
| Dimethylsulphoxide (DMSO)                               | Sigma                        | 276855                     |
| Carbonyl cyanide-3-chlorophenylhydrazone (CCCP)         | Sigma                        | C2759                      |
| BX-795 hydrochloride                                    | Sigma                        | SML0694                    |
| M-PER mammalian protein extraction reagent              | Thermo Scientific            | 78503                      |
| Halt protease and phosphatase inhibitor cocktail (100X) | Thermo Scientific            | 1861281                    |
| 0.5 M EDTA solution (100X)                              | Thermo Scientific            | 1861274                    |
| DC Protein Assay Kit II                                 | Bio-Rad                      | 5000112                    |
| Laemmli buffer (4X)                                     | Bio-Rad                      | 1610747                    |
| PageRuler™ Prestained Protein Ladder                    | Thermo Scientific            | PI26616                    |
| BioRad Mini-PROTEAN TGX precast gels                    | Bio-Rad                      | 4561024<br>4561025         |
| Running buffer (10x Tris/Glycine/SDS)                   | Bio-Rad                      | 1610732                    |
| Transfer buffer (10x Tris/Glycine)                      | Bio-Rad                      | 1610734                    |
| Immuno-blot PVDF membrane                               | Bio-Rad                      | 1620260                    |
| Methanol                                                | Sigma                        | 34860                      |
| TBS buffer 20x                                          | VWR                          | J640                       |
| Tween 20                                                | Sigma                        | P9416                      |
| Clarity Max Western ECL substrate                       | Bio-Rad                      | 1705060                    |
| DAPI                                                    | Molecular Probes             | D1206                      |
| MitoTracker™ Deep Red FM (MTDR)                         | Invitrogen                   | M22426                     |
| Paraformaldehyde 16% solution, EM grade                 | Electron Microscopy Sciences | 15710                      |
| Triton-X-100                                            | Sigma                        | T8787                      |
| Donkey Serum                                            | Sigma                        | D9663                      |
| RNeasy Mini Kit                                         | Qiagen                       | 74104                      |

|                                                                 |                              |            |
|-----------------------------------------------------------------|------------------------------|------------|
| 5x all-in-one RT MasterMix (with AccuRTGenomic DNA Removal kit) | Applied biological materials | G492       |
| BlasTaq 2X qPCR MasterMix                                       | Abcam                        | G891       |
| DNeasy Blood & Tissue Kit                                       | Qiagen                       | 69506      |
| TaqMan Fast Universal PCR Master Mix (2X), no AmpErase UNG      | Applied Biosystems           | 4352042    |
| TaqMan™ Copy Number Reference Assay, human, RNase P             | Applied Biosystems           | 4403326    |
| JC1 dye                                                         | Cayman Chemicals             | 10009172   |
| ApoTox-Glo™ Triplex Assay                                       | Promega                      | G6320      |
| Seahorse XF Cell Mito Stress Test Kit                           | Agilent                      | 103015-100 |
| Seahorse XF DMEM medium, pH 7.4                                 | Agilent                      | 103575-100 |
| Seahorse XF 1.0 M glucose solution                              | Agilent                      | 103577-100 |
| Seahorse XF 100 mM pyruvate solution                            | Agilent                      | 103578-100 |
| Seahorse XF 200 mM glutamine solution                           | Agilent                      | 103579-100 |
| Oligomycin from <i>Streptomyces diastatochromogenes</i>         | Sigma                        | O4876      |
| Antimycin A from <i>Streptomyces</i> sp.                        | Sigma                        | A8674      |
| Rotenone                                                        | Sigma                        | R8875      |
| 2-Deoxy-D-glucose                                               | Sigma                        | D8375      |
| Carbonyl cyanide 4-(trifluoromethoxy)phenylhydrazone (FCCP)     | Sigma                        | C2920      |

#### ANTIBODIES

| Antibody                                   | Manufacturer                | Catalog Number |
|--------------------------------------------|-----------------------------|----------------|
| β-actin (rabbit)                           | Cell signaling technologies | 4967S          |
| GAPDH (rabbit monoclonal)                  | Cell signaling technologies | 2118S          |
| PGC1α - N-terminal (rabbit)                | Abcam                       | ab191838       |
| Human Phospho-PGC1α (S571) (rabbit)        | R&D Systems                 | AF6650         |
| AMPKα (rabbit)                             | Cell signaling technologies | 2532S          |
| Phospho-AMPKα (Thr172) (rabbit monoclonal) | Cell signaling technologies | 2535T          |
| PGC1β (rabbit monoclonal)                  | Abcam                       | ab176328       |
| LC3B (rabbit)                              | Sigma                       | L7543          |
| Goat anti-rabbit-IgG1-HRP-linked Ab        | Cell signaling technologies | 7074S          |
| Optineurin (C-Term) (rabbit polyclonal)    | Cayman Chemicals            | 100000         |
| TOM 20 (mouse)                             | Santa Cruz                  | sc-17764       |
| Tubulin β 3 (TUBB3) (mouse)                | Biologend                   | 801202         |
| RBPMS (rabbit)                             | GeneTex                     | GTX118619      |
| Donkey anti-mouse Alexa Fluor 488          | Invitrogen                  | A12379         |
| Donkey anti-rabbit Alexa Fluor 647         | Invitrogen                  | A31573         |
| Donkey anti-rabbit Alexa Fluor 488         | Invitrogen                  | A21206         |

#### SOFTWARE AND ALGORITHMS

|                         |                                                                                               |
|-------------------------|-----------------------------------------------------------------------------------------------|
| ImageJ                  | NIH                                                                                           |
| Prism version 9         | GraphPad                                                                                      |
| Zen Microscope Software | Zeiss                                                                                         |
| Seahorse Wave Desktop   | Agilent                                                                                       |
| PrimerBank              | <a href="https://pga.mgh.harvard.edu/primerbank/">https://pga.mgh.harvard.edu/primerbank/</a> |
| BioRender               | Biorender.com                                                                                 |

#### PRIMERS FOR qPCR

|       |                           |                              |
|-------|---------------------------|------------------------------|
| GAPDH | PrimerBank ID: 83641890b1 | F: 5'AAGGTGAAGGTCGGAGTCAAC3' |
|-------|---------------------------|------------------------------|



|                |                                                                                                   |                                                                 |
|----------------|---------------------------------------------------------------------------------------------------|-----------------------------------------------------------------|
|                |                                                                                                   | R: 5'GGGGTCATTGATGGCAACAATA3'                                   |
| PGC 1 $\alpha$ | PrimerBank ID: 116284374c1                                                                        | F: 5'TCTGAGTCTGTATGGAGTGACAT3'<br>R: 5'CCAAGTCGTTACATCTAGTTCA3' |
| PGC 1 $\beta$  | PrimerBank ID: 289577089c1                                                                        | F: 5'GATGCCAGCGACTTTGACTC3'<br>R: 5'ACCCACGTCATCTTCAGGGA3'      |
| PRC            | PrimerBank ID: 40807451c1                                                                         | F: 5'CAAGCGCCGTATGGGACTTT3'<br>R: 5'GGAGGCATCCATGTAGCTCT3'      |
| NRF 1          | PrimerBank ID: 93141038c1                                                                         | F: 5'AGGAACACGGAGTGACCCAA3'<br>R: 5'TATGCTCGGTGTAAGTAGCCA3'     |
| NRF 2          | PrimerBank ID: 372620347c1                                                                        | F: 5'TCAGCGACGAAAGAGTATGA3'<br>R: 5'CCACTGGTTTCTGACTGGATGT3'    |
| ND1 F          |                                                                                                   | 5'CCTTCGCTGACGCCATAAA3'                                         |
| ND1 R          | <a href="https://doi.org/10.1007/s13277-014-2937-2">https://doi.org/10.1007/s13277-014-2937-2</a> | 5'TGGTAGATGTGGCGGGTTTT3'                                        |
| ND1 Probe      |                                                                                                   | 6FAM-5'TCTTCACCAAAGAGCC3'-MGBNFQ                                |
