# Supplementary material for: Enhanced mitochondrial biogenesis promotes neuroprotection in human pluripotent stem cell derived retinal ganglion cells
Source: PubMed Central journal article supplement (PMC9957998; doi:10.1038/s42003-023-04576-w), 2023-02-24
Supplement: 42003_2023_4576_MOESM3_ESM.pdf [file 42003_2023_4576_MOESM3_ESM.pdf]

## **Description of Additional Supplementary Files**

File name: Supplementary Data 1

Description: The source data behind the graphs in the paper.
